# Supplementary material
Source: Royal Society of Chemistry journal article supplement (doi:10.1039/d5ta10373h)
Supplement: d5ta10373h1.pdf [file d5ta10373h1.pdf]

## Supporting Information

### Comparison of the Arrhenius Parameters Between Conventional Hydrothermal and Microwave-Assisted Synthesis Methods for Tin Oxide Nanoparticles

Morgan Chen,<sup>a</sup> Laura Gleis Graversen,<sup>b</sup> Sanjit Ghose,<sup>c</sup> Kirsten M. Ø. Jensen,<sup>b</sup> B. Reeja-Jayan<sup>a</sup>

#### Pair Distribution Function (PDF) Analysis

The 2D diffraction data was azimuthally integrated with the Fit2D software to obtain 1D diffraction intensities.<sup>[1]</sup> The PDF data processing was performed using PDFgetX3 within the xPDFsuite software to subtract out the signal from the background and to set the Fourier transformation limits (see Fig. 2).<sup>[2]–[4]</sup> The experimental PDF, or  $G(r)$ , given by:

$$G(r) = \frac{2}{\pi} \int_{Q_{min}}^{Q_{max}} F(Q) \sin(Qr) dQ$$

where  $F(Q)$  is the background-subtracted, corrected, and normalized reduced structure function,  $Q$  is the scattering momentum transfer, and  $r$  is the interatomic distance between atoms.

The data was transformed with  $Q_{min} = 0.5 \text{ \AA}^{-1}$  and  $Q_{max} = 17.5 \text{ \AA}^{-1}$ . Structural refinements and analysis were conducted using PDFgui [5].<sup>[5]</sup> The instrument resolution parameters  $Q_{damp}$  and  $Q_{broad}$  are refined when fitting the standard  $\text{CeO}_2$  data, and are fixed in the subsequent structural refinements of PDF data, where  $Q_{damp} = 0.0307 \text{ \AA}^{-1}$  and  $Q_{broad} = 0.0478 \text{ \AA}^{-1}$ .<sup>[5][6]</sup> Least-square refinements were performed by minimizing the fit residual between the structural model and the experimental data, quantified by the goodness-of-fit  $R_w$ , which is defined as:

$$R_w = \sqrt{\frac{\sum_{i=1}^N [G_{obs}(r_i) - G_{calc}(r_i; P)]^2}{\sum_{i=1}^N G_{obs}^2(r_i)}}$$

where  $G_{obs}$  is the PDF of the experimental data,  $G_{calc}$  is the PDF calculated from the structure model, and  $P$  is the set of refinable parameters used in the structure model. Lower values of  $R_w$  represent a higher-quality match between the experimental PDF and the refined model PDF.

**Table S1.** PDF refinement results for the final SnO<sub>2</sub> nanoparticles from conventional hydrothermal and microwave-assisted synthesis conditions. The lower final yield from the microwave-assisted synthesis conditions resulted from premature vessel rupture during nanoparticle growth due to autogenous pressure buildup and did not affect the extraction of rate constants that provided the relevant Avrami and Arrhenius parameters.

|                                                                                                           | Conventional<br>(164 °C) | Conventional<br>(174 °C) | Conventional<br>(181 °C) | Microwave<br>(130 °C) | Microwave<br>(138 °C) | Microwave<br>(143 °C) |
|-----------------------------------------------------------------------------------------------------------|--------------------------|--------------------------|--------------------------|-----------------------|-----------------------|-----------------------|
| SnO <sub>2</sub> Phase Scale Factor                                                                       | 0.172                    | 0.296                    | 0.208                    | 0.169                 | 0.220                 | 0.149                 |
| [SnCl <sub>4</sub> (H <sub>2</sub> O) <sub>2</sub> ] <sub>2</sub> ·H <sub>2</sub> O Phase<br>Scale Factor | 1.82                     | 1.04                     | 1.67                     | 1.62                  | 3.30                  | 4.04                  |
| SnO <sub>2</sub> Mass (relative)                                                                          | 0.070                    | 0.201                    | 0.095                    | 0.081                 | 0.054                 | 0.030                 |
| [SnCl <sub>4</sub> (H <sub>2</sub> O) <sub>2</sub> ] <sub>2</sub> ·H <sub>2</sub> O Mass<br>(relative)    | 0.930                    | 0.799                    | 0.905                    | 0.919                 | 0.946                 | 0.970                 |
| a (Å)                                                                                                     | 4.77                     | 4.76                     | 4.76                     | 4.76                  | 4.76                  | 4.76                  |
| c (Å)                                                                                                     | 3.19                     | 3.18                     | 3.19                     | 3.19                  | 3.19                  | 3.19                  |
| Sn U <sub>iso</sub> (Å <sup>2</sup> )                                                                     | 0.005                    | 0.006                    | 0.005                    | 0.005                 | 0.006                 | 0.006                 |
| O U <sub>iso</sub> (Å <sup>2</sup> )                                                                      | 0.042                    | 0.040                    | 0.048                    | 0.039                 | 0.028                 | 0.041                 |
| δ <sub>1</sub>                                                                                            | 1.64                     | 2.77                     | 1.58                     | 1.69                  | 1.53                  | 1.85                  |
| Nanoparticle Diameter (Å)                                                                                 | 38.5                     | 49.0                     | 44.5                     | 38.1                  | 38.7                  | 41.2                  |
| R <sub>w</sub>                                                                                            | 0.284                    | 0.204                    | 0.274                    | 0.289                 | 0.209                 | 0.209                 |

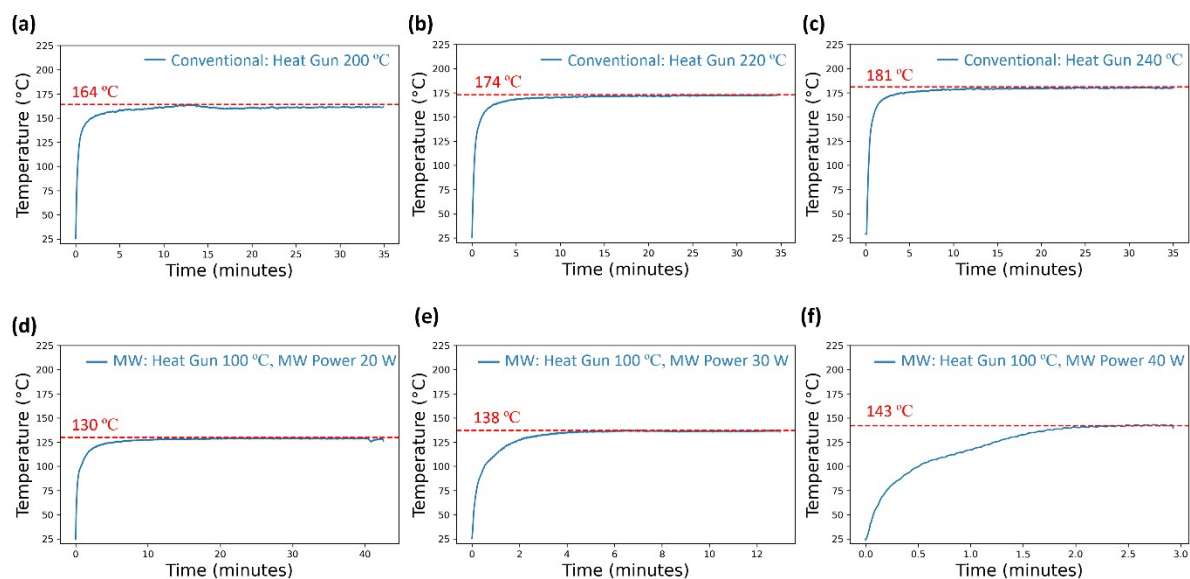

**Figure S1.** Plots of the measured steady state or maximum temperatures of the reaction tube at the various MW and conventional synthesis conditions. (a) The temperature profile of the conventional synthesis condition with a heat gun output temperature at 200 °C. (b) The temperature profile of the conventional synthesis condition with a heat gun output temperature at 220 °C. (c) The temperature profile of the conventional synthesis condition with a heat gun output temperature at 240 °C. (d) The temperature profile of the MW-assisted synthesis condition with a heat gun output temperature at 100 °C and a pulsed MW power of 20 W. (e) The temperature profile of the MW-assisted synthesis condition with a heat gun output temperature at 100 °C and a pulsed MW power of 30 W. (f) The temperature profile of the MW-assisted synthesis condition with a heat gun output temperature at 100 °C and a pulsed MW power of 40 W.

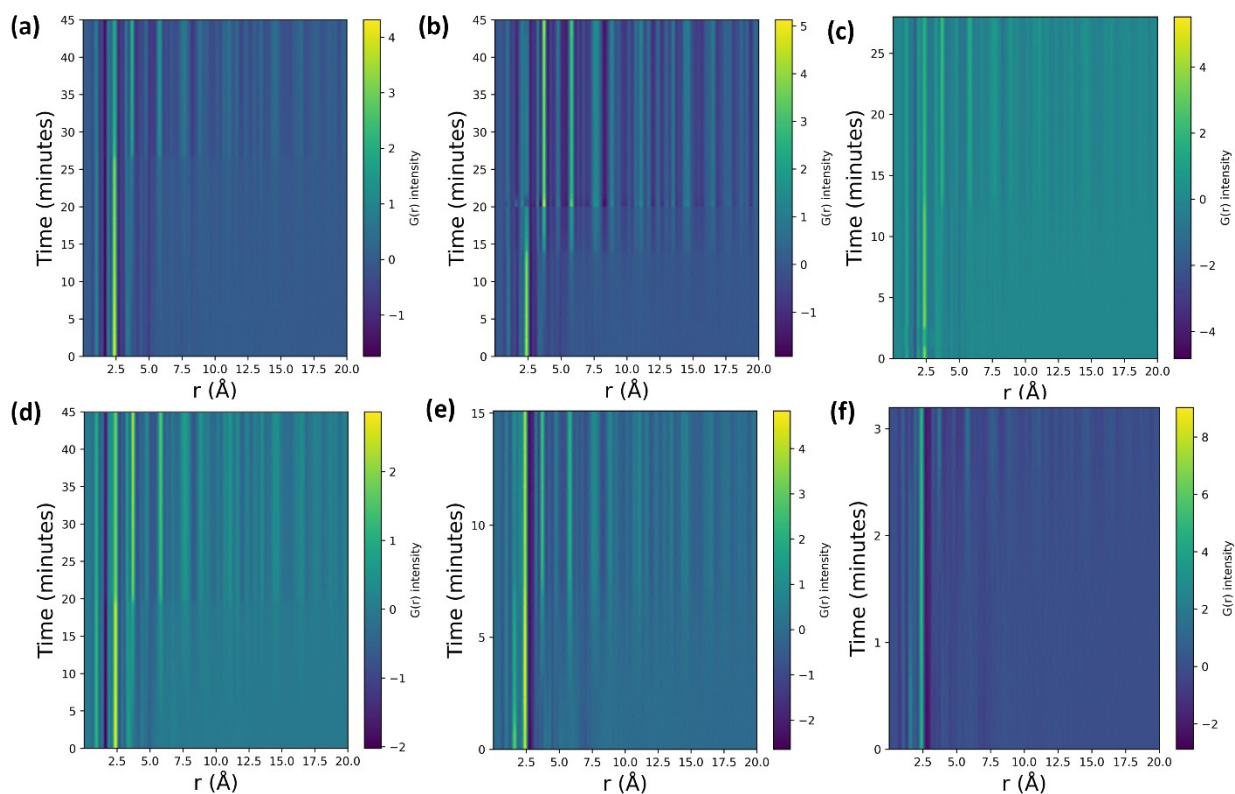

**Figure S2.** The in-situ PDF plots from the various MW and conventional synthesis conditions. (a) Time-resolved map of the in-situ PDFs corresponding to the conventional hydrothermal synthesis of SnO<sub>2</sub> nanoparticles at 164 °C. (b) Time-resolved map of the in-situ PDFs corresponding to the conventional hydrothermal synthesis of SnO<sub>2</sub> nanoparticles at 174 °C (c) Time-resolved map of the in-situ PDFs corresponding to the conventional hydrothermal synthesis of SnO<sub>2</sub> nanoparticles at 181 °C. (d) Time-resolved map of the in-situ PDFs corresponding to the MW-assisted hydrothermal synthesis of SnO<sub>2</sub> nanoparticles at 130 °C. (e) Time-resolved map of the in-situ PDFs corresponding to the MW-assisted hydrothermal synthesis of SnO<sub>2</sub> nanoparticles at 138 °C. (f) Time-resolved map of the in-situ PDFs corresponding to the MW-assisted hydrothermal synthesis of SnO<sub>2</sub> nanoparticles at 143 °C.

**Table S2.** Resultant fit parameters from Avrami modeling for conventional hydrothermal and microwave-assisted synthesis.

|                        | Conventional<br>(164 °C) | Conventional<br>(174 °C) | Conventional<br>(181 °C) | Microwave<br>(130 °C) | Microwave<br>(138 °C) | Microwave<br>(143 °C) |
|------------------------|--------------------------|--------------------------|--------------------------|-----------------------|-----------------------|-----------------------|
| k (min <sup>-1</sup> ) | 0.433                    | 0.482                    | 0.511                    | 0.407                 | 0.459                 | 6.59                  |
| n                      | 0.72                     | 0.57                     | 0.61                     | 0.61                  | 1.26                  | 1.19                  |
| R <sup>2</sup>         | 0.947                    | 0.883                    | 0.962                    | 0.948                 | 0.976                 | 0.992                 |

**Table S3.** Resultant fit parameters and statistics from Arrhenius plots for conventional hydrothermal and microwave-assisted synthesis. The values determined for the microwave-assisted synthesis condition are shown in the first column labeled accordingly. The values determined for the microwave-assisted synthesis condition using only the experimentally accessible isothermal conditions is shown in the next column. The uncertainty quantification for this column is insignificant as a consequence of having only two data points. Therefore, the values should be interpreted with caution. The values determined for microwave-assisted synthesis conditions for hypothetical steady-state temperatures above the measured maximum of 143 °C in the third data point (to account for higher reaction temperatures due to local heating phenomena) are shown in the following columns. Regardless of the circumstances, the cases trend toward an elevated pre-exponential factor.

|                                                                    | Conventional | Microwave<br>(presented) | Microwave<br>(only steady-<br>state data) | Microwave<br>(third data<br>point at 193<br>°C) | Microwave<br>(third data<br>point at 243<br>°C) |
|--------------------------------------------------------------------|--------------|--------------------------|-------------------------------------------|-------------------------------------------------|-------------------------------------------------|
| Slope (K)                                                          | -1945        | -32570                   | -2490                                     | -8640                                           | -5229                                           |
| Y-intercept                                                        | 3.617        | 79.51                    | 5.28                                      | 20.40                                           | 12.01                                           |
| R <sup>2</sup>                                                     | 0.9968       | 0.6564                   | 1                                         | 0.9909                                          | 0.9982                                          |
| Standard Error for Slope                                           | 109.8        | 23560                    | 0                                         | 826.4                                           | 220.7                                           |
| Standard Error for Y-intercept                                     | 0.2463       | 57.48                    | 0                                         | 1.949                                           | 0.5070                                          |
| Apparent Activation Energy, E <sub>a</sub> (kJ mol <sup>-1</sup> ) | 16.17        | 270.8                    | 20.70                                     | 71.83                                           | 43.47                                           |
| Apparent Pre-Exponential Factor, A (min <sup>-1</sup> )            | 37.22        | 3.401E+34                | 196.0                                     | 7.26E+8                                         | 1.65E+5                                         |
| Standard Error for E <sub>a</sub> (kJ mol <sup>-1</sup> )          | ±0.9127      | ±195.9                   | 0                                         | ±6.871                                          | ±1.835                                          |
| Standard Error for A (min <sup>-1</sup> )                          | ±9.165       | ±1.956E+36               | 0                                         | ±1.415E+9                                       | ±8.359E+4                                       |

## References

- [1] A.P. Hammersley, S.O. Svensson, M. Hanfland, A.N. Fitch, D. Hausermann, *High Pressure Research* **1996**, *14*, 235.
- [2] X. Yang, P. Juhas, C.L. Farrow, S.J.L. Billinge, **2015**.
- [3] P. Juhás, T. Davis, C.L. Farrow, S.J.L. Billinge, *J Appl Crystallogr* **2013**, *46*, 560.
- [4] P.F. Peterson, E.S. Božin, T. Proffen, S.J.L. Billinge, *J Appl Crystallogr* **2003**, *36*, 53.
- [5] C.L. Farrow, P. Juhas, J.W. Liu, D. Bryndin, E.S. Božin, J. Bloch, T. Proffen, S.J.L. Billinge, *J. Phys.: Condens. Matter* **2007**, *19*, 335219.
- [6] Th. Proffen, S.J.L. Billinge, *J Appl Crystallogr* **1999**, *32*, 572.
